## Reversing the aging stromal phenotype prevents carcinoma initiation

Davina A. Lewis<sup>1</sup>, Jeffrey B. Travers<sup>1,2,3</sup>, Christiane Machado<sup>1</sup>, Ally-Khan Somani<sup>1</sup>, and Dan F Spandau<sup>1,5</sup>

<sup>1</sup> Departments of Dermatology, Indiana University School of Medicine, Indianapolis, Indiana

<sup>2</sup> Pharmacology and Toxicology, Indiana University School of Medicine, Indianapolis, Indiana

<sup>3</sup> Herman B. Wells Center for Pediatric Research, Indiana University School of Medicine, Indianapolis, Indiana

<sup>4</sup> Richard L. Roudebush V.A. Medical Center, Indiana University School of Medicine, Indianapolis, Indiana

<sup>5</sup> Biochemistry & Molecular Biology, Indiana University School of Medicine, Indianapolis, Indiana

**Key words:** Senescence, aging, photocarcinogenesis, therapy, UVB

**Received:** 4/1/11; **Accepted:** 4/20/11; **Published:** 4/21/11

**Corresponding author:** Dan F Spandau, PhD; **E-mail:** [dspanda@iupui.edu](mailto:dspanda@iupui.edu)

**Copyright:** © Lewis et al. This is an open-access article distributed under the terms of the Creative Commons Attribution License, which permits unrestricted use, distribution, and reproduction in any medium, provided the original author and source are credited

**Abstract:** The accumulation of senescent stromal cells in aging tissue changes the local microenvironment from normal to a state similar to chronic inflammation. This inflammatory microenvironment can stimulate the proliferation of epithelial cells containing DNA mutations which can ultimately lead to cancer. Using geriatric skin as a model, we demonstrated that senescent fibroblasts also alter how epithelial keratinocytes respond to genotoxic stress, due to the silencing of IGF-1 expression in geriatric fibroblasts. These data indicate that in addition to promoting epithelial tumor growth, senescent fibroblasts also can promote carcinogenic initiation. We hypothesized that commonly used therapeutic stromal wounding therapies can reduce the percentage of senescent fibroblasts and consequently prevent the formation of keratinocytes proliferating with DNA mutations following acute genotoxic (UVB) stress. Sun-protected skin on the lower back of geriatric human volunteers was wounded by dermabrasion and the skin was allowed to heal for three months. In geriatric skin, we found that dermabrasion wounding decreases the proportion of senescent fibroblasts found in geriatric dermis, increases the expression of IGF-1, and restores the appropriate UVB response to epidermal keratinocytes in geriatric skin. Therefore, dermal rejuvenation therapies may play a significant role in preventing the initiation of skin cancer in geriatric patients.

### INTRODUCTION

Cancer is an age-dependent disease in most mammalian species; in humans over 50% of cancers are found in people over 70 years of age [1]. Recently, the accumulation of senescent cells in aging tissues have been shown to acquire a chronic inflammatory phenotype (called SASP, Senescence-Associated Secretory Phenotype) that serves to promote the growth of initiated tumorigenic epithelial cells [2]. Additional reports have demonstrated that in the skin, the accumulation of senescent fibroblasts also increases the susceptibility of epidermal keratinocytes to carcinogenic initiation [3]. Therefore, while investigations into the role of stromal tissue on the initiation and promotion of cancer are in their infancy,

they may serve as potential emerging opportunities for interventional and prophylactic therapeutic strategies [4-6]. Our lab is investigating the role of aging in the development of non-melanoma skin cancer (NMSC) as a model for the effect that aging stromal tissue has in controlling carcinogenesis initiation [3, 6-10]. As such, the skin is an excellent model system for these studies; it is accessible, it has a relevant environmental carcinogen (UVB), and it is possible to easily interrogate human disease.

NMSC has the highest incidence rate of all cancers worldwide, including an estimated 2 million newly diagnosed patients in the United States this year alone [11-12]. Although the mortality of NMSC is relatively low compared to other types of cancer, the morbidity

and the cost of treating NMSC is enormous [11, 13]. As NMSC occurs primarily in geriatric individuals, it has been estimated that up to nearly 1% of total Medicare expenses in the United States go towards the treatment of NMSC [13]. Therefore, NMSC is a major burden on our healthcare system [14]. Despite our understanding for decades that sunlight is the main etiologic agent responsible for NMSC (over 90%), the incidence of NMSC continues to rise at an alarming rate [11].

The primary environmental factor that influences the development of skin cancer is exposure to the spectrum of ultraviolet wavelengths found in sunlight. Furthermore, as we age our chances of developing NMSC greatly increases so that at age 65 we have a 50% chance of acquiring a NMSC [15-16]. In fact, 80% of all NMSC are diagnosed in individuals greater than 60 years old [15-16]. While the correlation between aged epidermis and NMSC is apparent, the mechanism responsible for this relationship remains obscure. Early hypotheses describing why the incidence of NMSC increases with age, suggested that excessive sun exposure during adolescence causes mutations in clones of keratinocytes. Subsequently over many decades of genetic selection, these initiated keratinocytes will form detectable tumors [17-18]. However, recent studies have shown that more than 77% of our lifetime sun exposure occurs *after* the age of 18 [19], indicating the vast majority of damaging UVB-irradiation takes place later in life. In fact, more sun exposure occurs after age 59 (26%) than before age 18 (23%) [19]. Recent data from a variety of labs have proposed a modification in the latency theory of carcinogenesis [20-21] based on changes in the effects of stromal cells (i.e. fibroblasts) on epithelial cells in aged individuals [22-23]. This new hypothesis states that the selection of initiated epithelial cells is accelerated in aged tissue due to alterations in gene expression by senescent fibroblasts supporting epithelial cell growth [24-26]. In addition, the aged state of cells may play a greater role in the initiation of carcinogenic DNA mutations than was previously considered [27]. Previously we have shown that the activation of the insulin-like growth factor-1 receptor (IGF-1R) is critical for determining the response of skin keratinocytes to UVB irradiation *in vitro* and *in vivo* [3, 6-10]. If the IGF-1R is functionally inactive *in vitro* at the time of UVB-irradiation, surviving keratinocytes can continue to proliferate with the potential of converting the damaged DNA into initiating carcinogenic mutations [3, 5-6, 10]. Recent data from our laboratories have indicated that similar IGF-1R-dependent UVB responses occur in epidermal keratinocytes *in vivo* [3, 5-6, 10]. Because keratinocytes do not produce IGF-1, the majority of the IGF-1 supplied to the epidermis is

produced by dermal fibroblasts. Therefore, any deficiencies in dermal IGF-1 production could have profound effects on the response of epidermal keratinocytes to UVB irradiation. We have demonstrated that such an instance occurs in aged skin, as senescent dermal fibroblasts produce significantly lower levels of IGF-1 than youthful, proliferating fibroblasts [3]. Geriatric skin with lower IGF-1 levels responds inappropriately to UVB exposure and results in the production of keratinocytes that can proliferate with DNA damage. Moreover, we demonstrate that therapeutic treatment of geriatric skin can result in increased levels of dermal IGF-1 and protection against acute UVB-mediated formation of keratinocytes proliferating with DNA damage. We hypothesize that the reduced activation of the IGF-1R in aging skin due to silencing of IGF-1 expression in senescent fibroblasts is an important factor in the dramatic increase in NMSC observed in geriatric patients. The incorporation of recent data from our laboratories and these new ideas on the origins of cancer has led us to a new paradigm to explain non-melanoma skin carcinogenesis [3, 5-6, 10]. This new paradigm indicates that the accumulation of senescent fibroblasts in geriatric dermis leads to a silencing of IGF-1 expression in the skin, resulting in a deficient activation of the IGF-1R in epidermal keratinocytes, causing an inappropriate UVB-response in keratinocytes, leading to proliferating keratinocytes containing DNA mutations, and subsequently photocarcinogenesis [3, 5-6]. Therefore, the susceptibility to develop NMSC is dependent on both the exposure of skin to UVB and the biologic age of the skin.

Given our findings that the lack of endogenous IGF-1 [3] in geriatric skin resulted in an inappropriate pro-carcinogenic response to relatively low doses of UVB [3], and that this inappropriate response was reversed by local injections of *exogenous* IGF-1 [3], these studies have examined the ability of dermal wounding to upregulate *endogenous* IGF-1 levels and restore the appropriate UVB response in geriatric skin. We assayed whether ablation of both the epidermis and papillary dermis by dermabrasion could upregulate IGF-1 expression in geriatric skin and restore the appropriate UVB response. The successful development of the prophylactic therapies as described here could have a major impact on how NMSCs can be prevented in susceptible individuals.

## RESULTS

### Senescent human fibroblasts *in vitro* contain markers of the DNA damage response

Normal human fibroblasts that are continually cultured

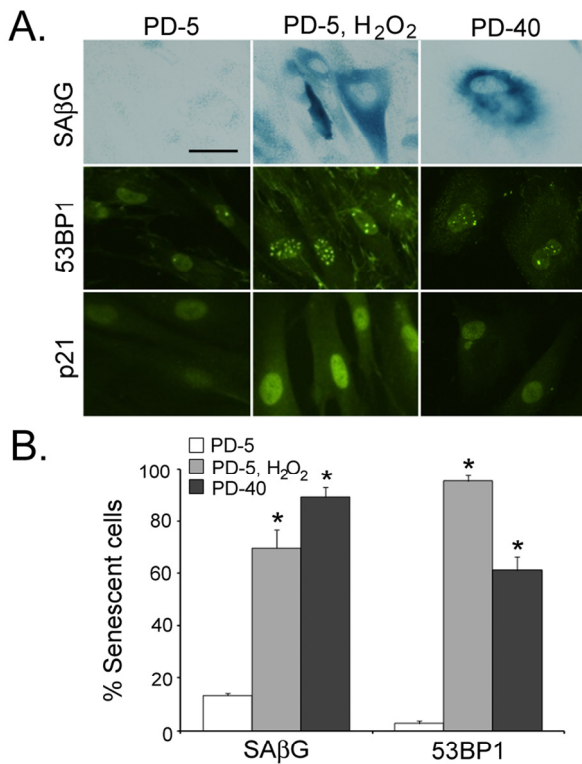

**Figure 1. Senescent human fibroblasts contain markers of DNA damage response *in vitro*.** (A) Low passage neonatal normal human fibroblasts (PD-5), stress-induced senescent fibroblasts (PD-5, H<sub>2</sub>O<sub>2</sub>), and replicatively senescent fibroblasts (PD-40) were stained for the presence of senescence-associated β-galactosidase activity (blue), with α-53BP1 antibodies (multiple punctate nuclear staining), or α-p21 antibodies (bar = 20 μm). (B) The percentage of senescent cells were determined for senescence-associated β-galactosidase and 53BP1 staining. 53BP1-positive cells contained at least four individual fluorescent pin-point spots per nucleus (asterisks indicate significant difference from PD-5 cells,  $p < 0.001$ , two-tailed t-test).

*in vitro* until they reach replicative senescence have historically been identified by their expression of senescence-associated β-galactosidase [28]. Similarly, replicating fibroblasts treated with DNA-damaging chemotherapeutic drugs or pro-oxidative stressors to induce stress-induced senescence have been assayed for senescence-associated β-galactosidase activity to verify their senescence phenotype [3]. However, because identifying senescent cells using senescence-associated β-galactosidase requires an assay of enzymatic activity, its use in specimens from human tissues is not as effective. Recently, it has been described that markers

of a DNA-damage response (DDR) are found in most types of senescent cells, whether induced by replication exhaustion, reactive oxygen species, or oncogene expression [29-32]. To determine the reliability of DDR markers to identify senescent fibroblasts in skin, replicating, stress-induced senescent, and replicative senescent fibroblasts were stained for the traditional senescence-associated β-galactosidase activity, for the presence of 53BP1, and for the expression of cell cycle inhibitor p21 (Fig. 1A). As seen in Fig. 1A, senescent fibroblasts can be identified by nuclei which have greater than four 53BP1-positive foci. When the numbers of senescent fibroblasts were counted in stress-induced senescent and replicatively senescent fibroblasts, the use of either senescence-associated β-galactosidase or 53BP1 foci yielded similar results (Fig. 1B). Therefore, markers of DDR may be useful in identifying senescent fibroblasts *in vivo*.

### Senescent fibroblasts accumulate in geriatric dermis *in vivo*

As we age, the skin becomes altered both phenotypically and biologically. The undulating structure of the dermal-epidermal junction in young skin becomes significantly flattened with age [33-34; Supplemental Fig. 1A]. Both the epidermis and the papillary dermis become atrophied in geriatric skin [33-37; Fig. 2D] and the transcriptome in the geriatric dermis becomes altered, including the relative silencing of the IGF-1 and collagen I genes [3; Fig. 2B]. Additionally, fibroblast morphology transforms from a spindle-shaped cell body and elliptical nucleus to a more rounded cell body and a rounded nucleus [37-38; Supplemental Fig. 1A, white circles]. These morphological changes in fibroblast shape are associated with increasing proportions of senescent fibroblasts in the papillary dermis (Fig. 2C). These senescent fibroblasts can be defined *in vivo* by increased expression of DDR markers (Fig. 2A). Previously, we and others have shown that senescent fibroblasts *in vitro* silence IGF-1 expression [3]. Similarly, intrinsic aging of skin *in vivo* can be characterized by a significantly increased proportion of senescent fibroblasts in the papillary dermis and a corresponding silencing of IGF-1 expression in geriatric dermis.

### Dermabrasion restores young adult function in geriatric dermis

Cosmetic dermal rejuvenation techniques have been widely used to stimulate the production of new collagen synthesis by inducing a 'wounding response' in the skin [39-40]. As such, it was of interest to determine if these dermal rejuvenation techniques restored a more youth-

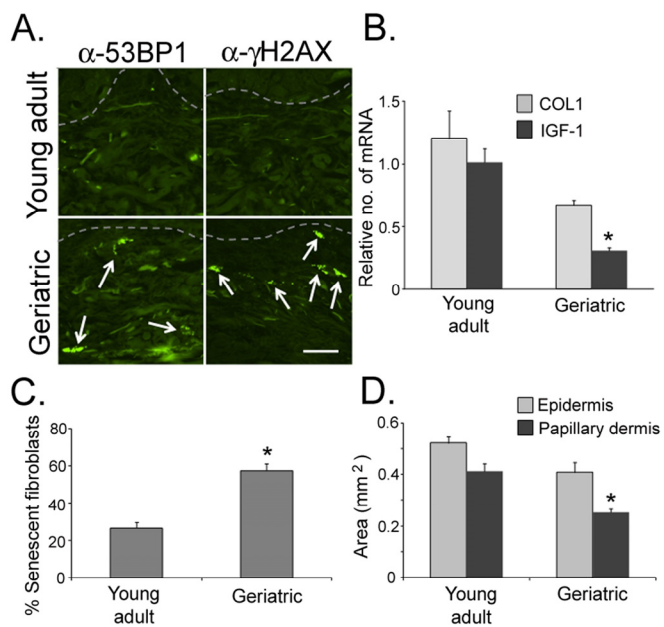

**Figure 2. Senescent fibroblasts accumulate in geriatric dermis *in vivo*.**

Biopsies of sun-protected skin were obtained from six young adult (20-28 years old) and six geriatric ( $\geq 65$  years old) volunteers. (A) Sections of skin were stained with antibodies to 53BP1 and  $\gamma$ H2AX. Positive nuclei are indicated by white arrows; dashed line specifies the location of the basement membrane; bar = 25  $\mu$ m. (B) Quantitative PCR analysis of mRNA isolated from skin biopsies, normalized to actin expression. Asterisk indicate statistical significance from young adult values (IGF-1  $p=0.005$ , COL1  $p=0.091$ ; two-tailed t-test). (C) The number of senescent fibroblasts (based on circular or elliptical nuclear morphology as determined using Nikon Elements Image Analysis software) was counted in the papillary dermis. Asterisk indicates statistical significance from young adult values ( $p=0.001$ ; two-tailed t-test). (D) The area of the epidermis and papillary dermis were calculated from 3mm punch biopsies using Nikon Elements image analysis software. Asterisk indicates statistical significance from young adult values (Epidermis  $p=0.0577$ , Papillary dermis  $p=0.022$ ; two-tailed t-test).

ful phenotype and biology to geriatric skin, and specifically to determine if these techniques could restore the appropriate DNA-damage response found in young skin to UVB-irradiated geriatric skin. Small areas of sun-protected skin on geriatric volunteers were treated by dermabrasion. Biopsies of dermabraded and untreated skin were analyzed after the treated sites were allowed to heal for three months. Consistent with previous reports, dermabraded skin demonstrated increased synthesis of collagen [39-40; Supplemental Fig. 2] and a restoration of the dermal collagen structure similar to that found in young adults (Fig. 3A, panels *i* and *iv*). Dermabrasion also reversed the aging-associated

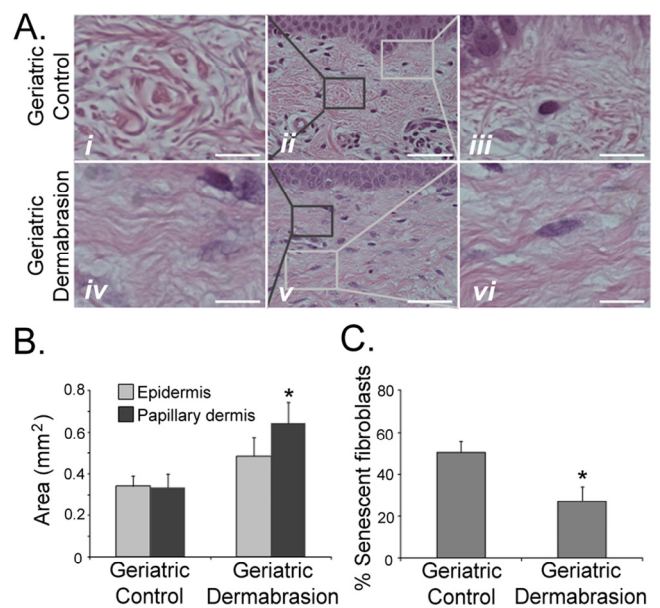

**Figure 3. Dermabrasion restores young adult fibroblast function in geriatric dermis.**

A 5 cm<sup>2</sup> area of sun-protected skin on geriatric ( $\geq 65$  years old) volunteers was dermabraded. After a healing period of three months, biopsies of untreated and dermabraded skin were obtained. (A) Representative H&E sections from untreated and dermabraded geriatric skin. Panels *i* and *iv* are higher magnification images of dark boxes indicated in panels *ii* and *v*. Panels *iii* and *vi* are higher magnification images of light boxes indicated in panels *ii* and *v*. Panels *i* and *iv*, bar=10  $\mu$ m; panels *ii* and *v*, bar=50  $\mu$ m; panels *iii* and *vi*, bar=12.5  $\mu$ m. (B) The area of epidermis and papillary dermis were calculated as described in Fig. 2. Asterisk indicates statistical significance from geriatric control values (Epidermis  $p=0.287$ , Papillary dermis  $p=0.013$ ; two-tailed t-test). (C) The number of senescent fibroblasts in the papillary dermis was determined as described in Fig. 2. Asterisk indicates statistical significance from control values ( $p=0.018$ , two-tailed t-test).

atrophy of the papillary dermis (Fig. 2D) by significantly increasing the area of the papillary dermis (Fig. 3B). The thickness of the epidermis was modestly increased by dermabrasion, although this result was not statistically significant (Fig. 3B). Increased thickness of the papillary dermis was accompanied by an increase in fibroblast density in the dermabraded geriatric skin (Fig. 4B; see Supplemental Fig. 3 for example of fibroblast verification) and statistically greater numbers of replicating keratinocytes and fibroblasts (Fig. 4C). The increased proliferative potential of fibroblasts in the dermis corresponded with a decrease in the proportion of dermal senescent fibroblasts (Fig. 3C). The round phenotype of the senescent fibroblast nuclei in control geriatric dermis was replaced with increasing percentages of replicating elliptical fibroblast nuclei

(Fig. 3A, panels *iii* and *vi*). The loss of senescent cells in dermabraded skin can also be observed by assaying for DDR markers. In contrast to the abundant expression of DDR markers in senescent fibroblasts of control geriatric dermis, DDR-positive fibroblasts are not detected in dermabraded geriatric dermis (Fig. 4A).

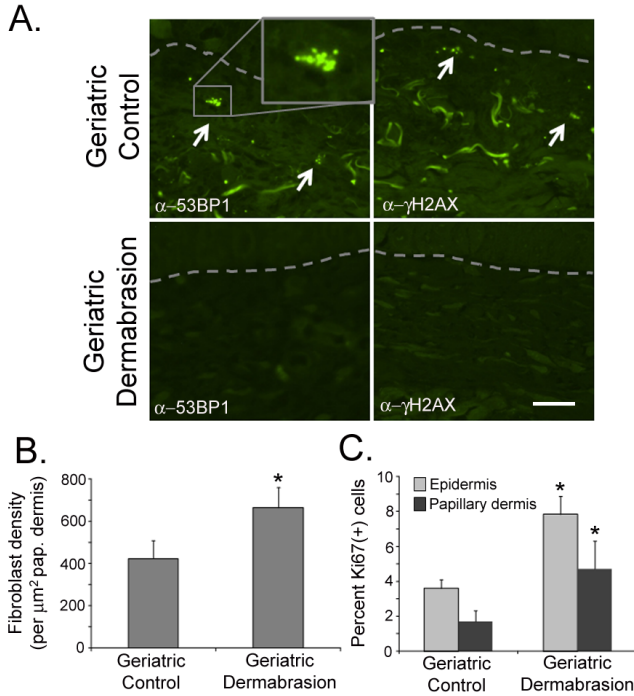

**Figure 4. Dermabrasion stimulates fibroblast replication and suppresses senescence in geriatric dermis.** (A) Skin biopsies described in Fig. 3 were stained with antibodies to 53BP1 and  $\gamma$ H2AX. Senescent nuclei are indicated by white arrows, the basement membrane is designated by a dashed grey line, bar=25  $\mu\text{m}$ . (B) The density of fibroblasts in the papillary dermis was determined using the Nikon Elements Image Analysis software. Asterisk indicates statistical significance from control values ( $p=0.0048$ ), two-tailed t-test). (C) Sections of biopsies were stained with antibodies to Ki67. The percentage of Ki67(+) fibroblasts in the papillary dermis and the percentage of Ki67(+) keratinocytes in the basal layer of the epidermis were calculated using Nikon Elements image analysis software. Asterisks indicate statistical significance from control values (papillary dermis,  $p=0.039$ ; epidermis  $p=0.058$ , two-tailed t-test).

Our previous data had shown that the silencing of endogenous IGF-1 in geriatric skin resulted in an inappropriate pro-carcinogenic response to relatively low doses of UVB which could be reversed by local injections of exogenous IGF-1 [3]. Therefore, it was important to determine whether IGF-1 expression was upregulated in geriatric skin treated with dermabrasion.

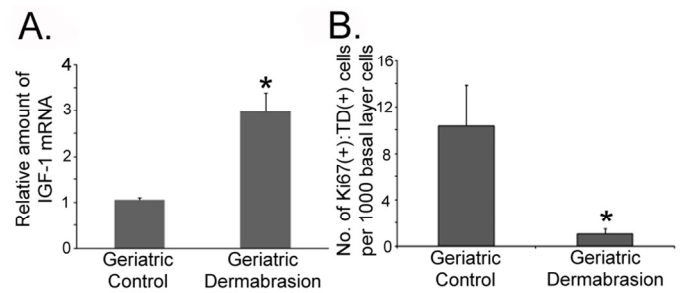

**Figure 5. Dermabrasion upregulates IGF-1 expression and restores the appropriate UVB response to geriatric skin.** Small areas of dermabraded and untreated skin on geriatric volunteers described in Fig. 2 were irradiated with UVB (dose of 350  $\text{J}/\text{m}^2$ ). Twenty-four hours post-UVB, the irradiated skin was biopsied. (A) Total mRNA was isolated and the relative level of IGF-1 expression was determined by quantitative PCR (normalized to actin expression). Asterisk indicates statistically significant differences from control values ( $p<0.006$ , two-tailed t-test). (B) Sections of biopsies were stained with antibodies to Ki67 and thymine dimers (TD). The number of dual Ki67(+):TD(+) basal keratinocytes were determined for both sets of biopsies. Asterisk indicates statistically significant differences from control values ( $p<0.05$ , two-tailed t-test).

At three months following dermabrasion, IGF-1 expression was three-fold higher in treated dermis compared to geriatric controls (Fig. 5A). To assay the UVB-response, small areas of the dermabraded skin and untreated skin on the opposing hip/buttock were irradiated with 350  $\text{J}/\text{m}^2$  (one MED) of UVB. Twenty-four hours post-irradiation (the time required to clear TD lesions), the UVB-irradiated areas were biopsied and the basal layer keratinocytes were assayed for co-expression of proliferation (Ki67) markers and UVB-induced DNA damage (TD; see examples of scored keratinocytes in Supplemental Figure 4). Consistent with the ability of dermabrasion to upregulate IGF-1 levels, UVB irradiation of control versus dermabraded skin were similar to our findings using young skin or geriatric skin treated with exogenous IGF-1 (i.e., no keratinocytes proliferating with DNA damage in the dermabraded skin in contrast to significant numbers of Ki67+:TD+ basal keratinocytes in untreated UVB-irradiated skin; Fig. 5B). These findings indicate that dermal rejuvenation upregulates IGF-1 levels and normalizes the UVB response in geriatric skin.

## DISCUSSION

We have demonstrated *in vivo* that geriatric skin accumulates increasing proportions of senescent fibroblasts as measured by changes in cellular and

nuclear morphology [3; Fig. 3] as well as the induction of DNA-damage recognition proteins associated with cellular senescence [3; Fig. 3]. Furthermore, we have shown that geriatric skin silences IGF-1 expression [3] leading to deficient activation of the IGF-1R [3] on geriatric epidermal keratinocytes. Therefore, when geriatric skin is irradiated with UVB, a portion of the epidermal keratinocytes respond inappropriately by allowing replication of UVB-damaged DNA and potentially creating 'initiated' tumor cells [3, 5-6]. The role of IGF-1 *in vivo* was confirmed by its ability to correct this inappropriate UVB response in geriatric skin by injection of IGF-1 into the dermis prior to UVB irradiation [3]. Thus, therapies that can restore IGF-1 expression to levels seen in young adult dermis could potentially prevent the initiation of carcinogenesis in geriatric skin. Skin rejuvenation techniques, including dermabrasion, have been widely used to stimulate dermal collagen production and promote a youthful appearance of the skin. We found that dermabrasion of sun-protected geriatric skin decreased the proportion of senescent fibroblasts resulting in increased IGF-1 expression. Most importantly, dermabrasion corrected the inappropriate UVB response normally observed in geriatric skin. These results suggest that dermabrasion of geriatric skin can prophylactically prevent non-melanoma skin carcinogenesis.

It is interesting to note that the use of dermabrasion to prophylactically treat actinic keratosis and NMSC was described over 40 years ago [41]. A number of reports have demonstrated that dermabrasion can reduce the incidence of actinic keratosis and NMSC up to 95% in susceptible individuals for many years after treatment [42-44]. However, the use of dermabrasion has fallen out of favor as a primary method for the prophylaxis of NMSC despite the fact that newer methods of prophylactic therapy, i.e. lasers, topical chemotherapy (5-fluorouracil, imiquimod), have never achieved the same level of effectiveness as dermabrasion [45-49]. In fact, studies of the efficacy of these modalities often use dermabrasion as the gold standard for NMSC prophylaxis [50].

Although the early studies on dermabrasion demonstrated its success in NMSC prophylaxis, the mechanism of how it prevented NMSC was unclear. It was hypothesized (but unproven) that the effectiveness of dermabrasion was due to the removal of previously initiated carcinogenic keratinocytes. However, if this hypothesis was true, other ablative procedures should be just as successful in treating NMSC, but they are not. Our studies suggest a new mechanism by which dermabrasion can prevent NMSC carcinogenesis which focuses on its effect on dermal fibroblasts. The

accumulation of senescent fibroblasts in geriatric dermis alters the susceptibility of epidermal keratinocytes to accumulate and fix UVB-induced mutations in their genomes. Furthermore, senescent fibroblasts have been shown to provide an enhanced environment for the growth of carcinogenically initiated epithelial cells via their upregulation of inflammatory cytokines [22-24]. Therefore, the preponderance of senescent fibroblasts in geriatric dermis not only promotes initiating mutations in UVB-exposed keratinocytes but they also promote the expansion of initiated clones of keratinocytes. As demonstrated in these studies, dermabrasion can dramatically reduce the proportion of senescent fibroblasts in treated geriatric dermis. Importantly, the elimination of senescent fibroblasts restores the expression of IGF-1 to normal levels, increases the production of collagen, and prevents the inappropriate UVB response in epidermal keratinocytes. These studies demonstrate an alternative mechanism, other than just removal of initiated keratinocytes, by which dermabrasion can protect geriatric skin from actinic neoplasia.

## METHODS

Human subjects. Geriatric volunteers were recruited from patients treated at Indiana University dermatology clinics. These studies were approved by the Indiana University School of Medicine Institutional Review Board and subjects have signed approved consent forms. Specific requirements for inclusion/exclusion from these studies can be found in the Supplemental Materials.

Dermabrasion. Prior to treatment, a region of sun-protected hip/buttock skin was photographed. Next, an approximately 5 x 5 cm area of the subject's lower hip/buttock skin was isolated and anesthetized with xylocaine anesthesia. Under sterile conditions the localized area of skin was then abraded with sterile, coarse (#60) sandpaper down to the mid dermis, with complete removal of all epidermis and superficial dermis. The wounded area was bandaged with moist, occlusive dressings and the volunteer was instructed to change the dressing twice daily until the wound is re-epithelized in 1-2 weeks. Approximately three months later (~Day 90 +/- 7 days) the volunteer returned to the clinic and a localized area 1 x 1 cm of either dermabrasion or untreated normal skin on the opposite hip/buttock was irradiated with dose of 350 J/m<sup>2</sup> of UVB. In Fitzpatrick Skin Types I and II, this dose of UVB is sufficient to cause a minimal erythematous reaction. Permanent marker was used to outline the areas of skin that was irradiated. Twenty-four hours following UVB exposure, photographs were taken of

the skin to document the extent of the UVB reaction. The irradiated skin, as well as unirradiated adjacent skin, was removed by punch biopsy, (4 mm punch biopsies of the UVB-treated skin and 3 mm punch biopsies of unirradiated skin; 4 biopsies per individual).

**Human UVB response assay.** The epidermal response to UVB irradiation was assayed as previously described [3]. Briefly, thin paraffin-embedded sections from unirradiated and UVB-irradiated biopsies were simultaneously stained with antibodies to Ki67 and thymine dimers. Secondary antibodies that specifically detect only one of the primary antibodies are conjugated to the fluorescent dyes AlexaFluor 488 (detecting Ki67, emitting green wavelengths), and AlexaFluor 568 (detecting thymine dimers, emitting red wavelengths). Images were captured sequentially along the entire length of the biopsy specimen (3mm non-irradiated, 4mm irradiated) using a Nikon Eclipse 80i microscope with Intensilight epifluorescence. These images were analyzed by counting the number of keratinocytes in contact with the basement membrane that are Ki67(+), thymine dimer(+), and Ki67(+):thymine dimer(+). These numbers were expressed as a percentage of total basal layer keratinocytes in the biopsy specimen (determined by counting basal layer keratinocytes for each specimen on H&E-stained slides).

**Statistical analysis.** Statistical analyses were done by two-tailed Student's t test. Statistical significance was defined as  $p < 0.05$  unless otherwise noted in the figure legend.

**Supplemental Material.** Four additional figures and specific protocols for quantitative reverse-transcription PCR, immunofluorescence, growth of human fibroblasts, and senescence-associated  $\beta$ -galactosidase assays can be found in the Supplemental Material.

## ACKNOWLEDGEMENTS

We are grateful to Dr. Raymond Konger for his valuable suggestions. This work was supported by grants from the National Institutes of Health (R21CA131901 to DFS; R01HL062996; U19A1070448 to JBT), VA Merit Award (JBT), and a Dermatology Foundation Career Development Award (AKS). The authors have no conflicts of interest in regard to the data presented in this manuscript.

## CONFLICT OF INTERESTS STATEMENT

The authors declare no conflicts of interest with the data or ideas presented in this manuscript.

## REFERENCES

1. Parkin DM, Bray FI, Devesa SS. Cancer burden in the year 2000. the global picture. *Euro J Cancer* 2001; 37: S4–S66.
2. Coppe JP, Desprez PY, Krtolica A, Campisi J. The senescence-associated secretory phenotype: the dark side of tumor suppression. *Ann Rev Path Mech Dis* 2010; 5: 99-118.
3. Lewis DA, Travers JB, Somani AK, Spandau DF. The IGF-1/IGF-1R signaling axis in the skin: a new role for the dermis in aging-associated skin cancer. *Oncogene* 2010; 29: 1475-1485.
4. Anisimov VN. Carcinogenesis and aging 20 years after: escaping horizon. *Mech of Ageing Develop* 2009; 130: 105-121.
5. Lewis DA, Travers JB, Spandau DF. A new paradigm for the role of aging in the development of skin cancer. *J Invest Dermatol* 2008; 129: 787-791.
6. Lewis DA, Travers JB, Spandau DF. (2010) Aging-associated non-melanoma skin cancer: a role for the dermis. In *Textbook of Aging Skin*, MA Farage, KW Miller and HI Maibach, eds. (Springer Berlin Heidelberg), pp 588-599.
7. Chuang T-Y, Lewis DA, Spandau DF. Decreased incidence of non-melanoma skin cancer in patients with type 2 diabetes mellitus using insulin: a pilot study. *Br J Dermatol* 2005; 153: 552-557.
8. Kuhn C, Kumar M, Hurwitz SA, Cotton J, Spandau DF. Activation of the insulin-like growth factor-1 receptor promotes the survival of human keratinocytes following ultraviolet B irradiation. *Intl J Cancer* 1999; 80: 431-438.
9. Lewis DA, Spandau DF. UVB-induced activation of NF- $\kappa$ B is regulated by the IGF-1R and dependent on p38 MAPK. *J Invest Dermatol* 2008; 128: 1022-1029.
10. Lewis DA, Yi Q, Travers JB, Spandau DF. UVB-induced senescence in human keratinocytes requires a functional IGF-1R and p53. *Mol Biol Cell* 2008; 19:1346-1353.
11. American Cancer Society. Cancer Facts and Figures 2010. [www.cancer.org/downloads/STT/Cancer\\_Facts\\_and\\_Figures\\_2010.pdf](http://www.cancer.org/downloads/STT/Cancer_Facts_and_Figures_2010.pdf)
12. Rogers HW, Weinstock MA, Harris AR, Hinckley MR, Feldman SR, Fleischer AB, et al. Incidence estimate of nonmelanoma skin cancer in the United States, 2006. *Arch Dermatol* 2010; 146: 283-287.
13. Bickers DR, Lim HW, Margolis D, Weinstock MA, Goodman C, Faulkner E, et. al. The burden of skin diseases. *J Am Acad Dermatol* 2006; 55: 490-500.
14. Housman TS, Feldman SR, Williford PM, Fleischer AB, Goldman ND, Acostamadiedo JM, et. al. Skin cancer is among the most costly of all cancers to treat for the Medicare population. *J Am Acad Dermatol* 2003; 48: 425-429.
15. Kraemer KH. Sunlight and skin cancer: another link revealed. *Proc Natl Acad Sci USA* 1997; 94: 11-14.
16. National Institutes of Health, Sun Protection in Cancer Trends Progress Report – 2009/2010, [www.cancer.gov](http://www.cancer.gov)
17. Brash DE, Ziegler A, Jonason AS, Simon JA, Kunala S, Leffell DJ. Sunlight and sunburn in human skin cancer: p53, apoptosis, and tumor progression. *J Invest Dermatol Symp Proc* 1996; 1: 136-142.
18. Jeffes EWB, Tang EH: Actinic keratosis: current treatment options. *Am J Clin Dermatol* 2000; 1: 167-179.
19. Godar DE, Urbach F, Gasparro FP, van der Leun JC. UV doses of young adults. *Photochem. Photobiol.* 2003; 77: 453-457.

20. Vogelstein B, Kinzler KW. Cancer genes and the pathways they control. *Nature Med* 2004; 10: 789-799.
21. Sjoblom T, Jones S, Wood LD, Parsons DW, Lin J, Barber TD, et. al. The consensus coding sequences of human breast and colorectal cancers. *Science* 2006; 314: 268-274.
22. Krtolica A, Parrinello S, Lockett S, Desprez PY, Campisi J. Senescent fibroblasts promote epithelial cell growth and tumorigenesis: A link between cancer and aging. *Proc Natl Acad Sci USA* 2001; 98: 12072-12077.
23. Parrinello S, Coppe J-P, Krtolica A, Campisi J. Stromal-epithelial interactions in aging and cancer: senescent fibroblasts alter epithelial cell differentiation. *J Cell Sci* 2005; 118: 485-496.
24. Campisi J. Senescent cells, tumor suppression, and organismal aging: good citizens, bad neighbors. *Cell* 2005; 120: 513-522.
25. Campisi J. Suppressing cancer: the importance of being senescent. *Science* 2005; 309: 886-887.
26. Dimri GP. What has senescence got to do with cancer? *Cancer Cell* 2005; 7: 505-512.
27. Feng Z, Hu W, Teresky AK, Hernando E, Cordon-Dardo C, Levine AJ. Declining p53 function in the aging process: a possible mechanism for the increased tumor incidence in older populations. *Proc Natl Acad Sci USA* 2007; 104: 16633-16638.
28. Dimri GP, Lee X, Basile G, Acosta M, Scott G, Roskelley C, et. al. A biomarker that identifies senescent human cells in culture and in aging skin in vivo. *Proc Natl Acad Sci USA* 1995; 92: 9363-9367.
29. d'Adda di Fagagna, F. Living on a break: cellular senescence as a DNA-damage response. *Nat Rev Cancer* 2008; 8: 512-522.
30. Pospelova TV, Demidenko ZN, Bukreeva EI, Pospelov VA, Gudkov AV, Blagosklonny MV. Pseudo-DNA damage response in senescent cells. *Cell Cycle* 2009; 8: 4112-4118.
31. Seviour EG, Lin SY. The DNA damage response: balancing the scale between cancer and ageing. *Aging* 2010; 2: 900-907.
32. Redon CE, Nakamura AJ, Martin OA, Parekh PR, Weyemi US, Bonner WM. Recent developments in the use of  $\gamma$ -H2AX as a quantitative DNA double-strand break biomarker. *Aging* 2011, 3: 168-174.
33. Makrantonaki E, Zouboulis CC. (2010). Pathomechanisms of endogenously aged skin. In *Textbook of Aging Skin*, MA Farage, KW Miller and HI Maibach, eds. (Springer Berlin Heidelberg), pp 93-99.
34. Ramos-e-Silva M, da Silva Carneiro SC. Elderly skin and its rejuvenation: products and procedures for the aging skin. *J Cosmetic Dermatol* 2007; 6: 40-50.
35. Helmbold P. (2010). Basophilic (actinic) degeneration of the dermis: an easy histological scoring approach in dermal photoaging. In *Textbook of Aging Skin*, MA Farage, KW Miller and HI Maibach, eds. (Springer Berlin Heidelberg), pp 19-21.
36. Farage MA, Miller KW, Maibach HI. (2010). Degenerative changes in aging skin. In *Textbook of Aging Skin*, MA Farage, KW Miller and HI Maibach, eds. (Springer Berlin Heidelberg), pp 25-35.
37. Mine S, Fortunel NO, Pigeon H, Asselineau D. Aging alters functionally human dermal papillary fibroblasts but not reticular fibroblasts: a view of skin morphogenesis and aging. *PLoS ONE* 2008; 3: e4066 (1-13).
38. Fisher GJ, Varani J, Voorhees JJ. Looking older: fibroblast collapse and therapeutic implications. *Arch Dermatol* 2008; 144: 666-672.
39. Lawrence N, Mandy S, Yarborough J, Alt T. History of dermabrasion. *Dermatol Surg* 2000; 26: 95-101.
40. Friedman S, Lippitz J. Chemical peels, dermabrasion, and laser therapy. *Dis Mon* 2009; 55: 223-235.
41. Epstein, E. Planing for precancerous skin: a ten-year evaluation. *California Med* 1966; 105: 26-27.
42. Benedetto AV, Griffin TD, Benedetto EA, Humeniuk HM. Dermabrasion: therapy and prophylaxis of the photoaged face. *J Am Acad Dermatol* 1992; 27: 439-447.
43. Coleman WP, Yarborough JM, Mandy SH. Dermabrasion for prophylaxis and treatment of actinic keratoses. *Dermatol Surg* 1996; 22: 17-21.
44. Field LM. Dermabrasion and premalignant disease. *Dermatol Surg* 1997; 23: 714.
45. Cooley JE, Casey DL, Kauffman CL. Manual resurfacing and trichloroacetic acid for the treatment of patients with widespread actinic damage. *Dermatol Surg* 1997; 23: 373-379.
46. Hantash BM, Stewart DB, Cooper ZA, Rehms WE, Koch RJ, Swetter SM. Facial resurfacing for nonmelanoma skin cancer prophylaxis. *Arch Dermatol* 2006; 142: 976-982.
47. Ostertag JU, Quaedvlieg PJF, Neumann MHAM, Kerkels GA. Recurrence rates and long-term follow-up after laser resurfacing as a treatment for widespread actinic keratoses in the face and on the scalp. *Dermatol Surg* 2006; 32: 261-267.
48. Halachmi S, Lapidot M. Lasers in skin cancer prophylaxis. *Exp Rev Anticancer Therapy* 2008; 8: 1713-1715.
49. Love WE, Bernhard JD, Bordeaux JS. Topical imiquimod or fluorouracil therapy for basal and squamous cell carcinoma. *Arch Dermatol* 2009; 145: 1431-1438.
50. Field LM. The superiority of dermabrasion over laser abrasion in the prophylaxis of malignant and premalignant disease. *Dermatol Surg* 2007; 33: 258-259.



## SUPPLEMENTAL MATERIAL

### Supplemental Experimental Procedures

Quantitative Reverse-Transcriptase PCR. Homogenized tissue from dissected dermal sections was lysed using RNeasy kit (Qiagen) buffers. Cell lysates were then further homogenized using Shredder columns (Qiagen) and RNA isolation continued with RNeasy kit. All of the reagents used for RT and PCR are obtained from SuperArray Biosciences, Frederick, MD. The following were added to a 0.2 ml tube where first a genomic DNA elimination step was performed on 2 µg RNA total volume 10 µl was heated to 42°C for 5 minutes and chilled on ice. Next the reverse transcription cocktail was prepared and 10 µl added to the RNA; 2 µl RT enzyme mix, 4 µl RT buffer, 1 µl primer and external control mix, 3 µl RNase free water. Mixture was heated 42°C for 15 minutes, 95°C for 5 minutes and chilled on ice for experiments, the final volume of cDNA was 20 µl. qRT-PCR is performed using a LightCycler PCR (Roche Scientific, Fishers IN). Quantization of experimental qRT-PCR products was determined by comparison with external control qRT-PCR products from templates of a known copy number. Relative copy numbers of experimental mRNA are then determined following adjustment with actin controls from the same tissue.

Immunofluorescence. Paraffin-embedded sections were deparaffinized, hydrated, and rinsed with tris-buffered saline with tween 20 (TBS) (DAKO, Carpinteria, CA). Antigen retrieval was performed using a water bath at 95°C for 20 minutes with DAKO Target Retrieval buffer. After cooling, the slides are rinsed with TBS, and the slides were then transferred to a clean 100 mm bacterial glass petri dish containing PBS-saturated filter paper under a strip of Parafilm. Primary antibodies (1:50) diluted in 3% BSA in TSB was added to the tissues. The lid was placed on the petri dish and the coverslips incubated for 1 hour at room temperature. The tissues were rinsed in PBS (three 10 minutes washes), and then the appropriate secondary antibody conjugated to the desired fluorochrome was added for 30 minutes at room temperature in the dark. The sections were washed as before, the edges blotted dry, and then mounted with coverslips using Fluoromount G. Antibodies used included: α-53BP1 (Abcam, Cambridge, MA), α-p21 (Cell Signaling, Danvers, MA), α-γH2AX (Millipore, Temecula, CA), α-prolyl-4-hydroxylase (Millipore, Temecula, CA), α-Ki67 (NeoMarkers, Fremont, CA), and α-thymine dimers (Kamiya Biomedical, Seattle, WA).

Senescence-associated β-galactosidase assays. Fibroblasts were washed twice with PBS and fixed with 2% formaldehyde/0.2% glutaraldehyde at room temperature for 10 minutes. After two additional washes with PBS, 2 ml of staining solution (150 mM sodium chloride, 25.2 mM sodium phosphate dibasic, 7.36 mM citric acid, 5 mM potassium ferricyanide, 5 mM potassium ferrocyanide, 2 mM magnesium chloride, 1 ng/ml 5-bromo-4-chloro-3-indolyl-β-D-galactoside, pH 6.0)<sup>25</sup>, were added to the cells and they were incubated at 37°C overnight. The cells were again washed with PBS and photographed by bright field microscopy to count blue cells and phase contrast microscopy to count total cells. At least four fields (100X magnification, approximately 200 cells/field) were counted for each plate of cells; at least two plates of cells for each condition (or cell type) were assayed in each experiment.

Isolation and culture of normal human fibroblasts. Excised foreskin tissue was washed with antibiotics, the tissue minced, and individual cells released from the tissue by trypsin digestion (8). Keratinocytes and fibroblasts were separated by differential resistance to treatment with EDTA. Fibroblasts were grown in Dulbecco's Modified Eagles medium containing 10% fetal calf serum. All relevant procedures using human tissue have been approved by the Indiana University School of Medicine Institutional Review Board.

**SUPPLEMENTAL FIGURES**

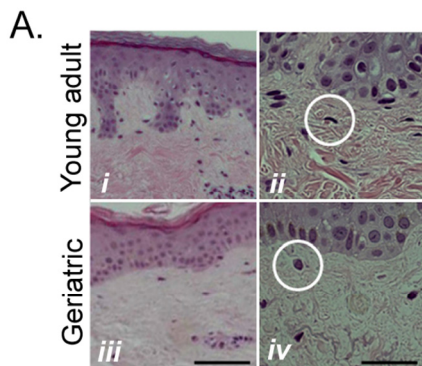

**Supplementary Figure 1. Phenotypic changes in geriatric skin.** (A) H&E sections of the biopsies described in Fig. 2. White circles indicate elliptical nucleus of a replicating fibroblast in panel *ii* and the spherical nucleus of a senescent fibroblast in panel *iv*. Bar=100  $\mu$ m in panels *i* and *iii*; bar=25  $\mu$ m in panels *ii* and *iv*. (B) The density of fibroblasts was determined in young adult and geriatric skin as described in Fig. 2 ( $p=0.093$ ; two-tailed t-test).

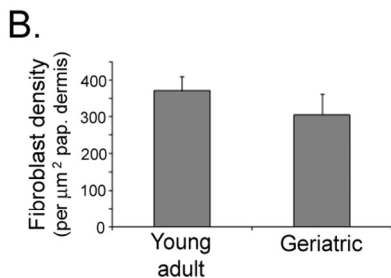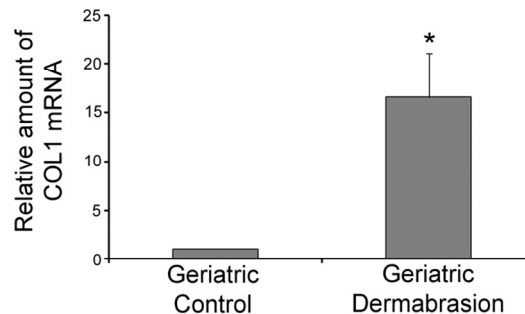

**Supplementary Figure 2. Dermabrasion increases collagen expression.** Quantitative PCR was conducted on biopsies described in Fig. 2. The relative amount of collagen I mRNA (normalized to actin expression) is shown. Asterisk indicates statistical significance from young adult values ( $p=0.018$ , two-tailed t-test).

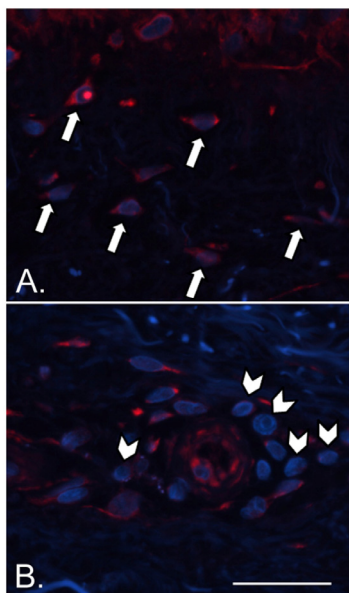

**Supplementary Figure 3. Identification of dermal fibroblasts in geriatric dermis.** Example of how the identity of fibroblasts was confirmed in the papillary dermis. Sections were stained with antibodies to  $\alpha$ -prolyl-4-hydroxylase (red) and DAPI (nuclear-specific stain, blue). Fibroblasts stain positive for  $\alpha$ -prolyl-4-hydroxylase and are indicated by arrows in panel A. Non-fibroblasts are indicated in panel B by chevrons.

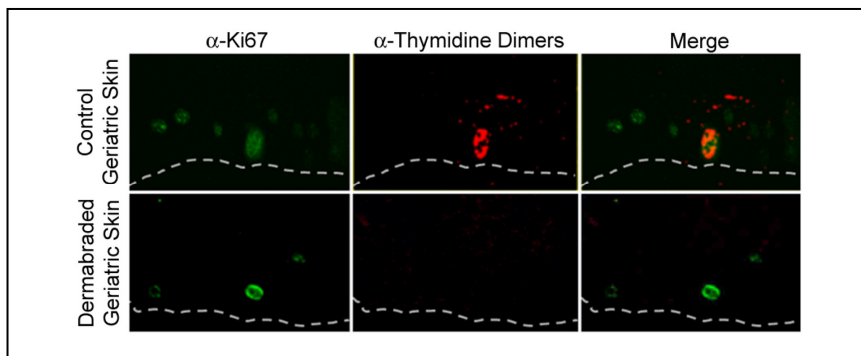

**Supplementary Figure 4. Example of the UVB-response assay.** Two  $\text{cm}^2$  areas on the lower backs of volunteers were irradiated with UVB (350  $\text{J}/\text{m}^2$ ). Twenty-four hours following irradiation, a four mm punch biopsy was obtained from the irradiated skin. Sections of formalin-fixed, paraffin-embedded tissue were stained with both  $\alpha$ -Ki67 (staining green) and  $\alpha$ -thymine dimer antibodies (staining red). The merged images are shown to the right of the figure. The top series of panels is an example of a cell positive for both Ki67 and thymine dimers (staining yellow, inappropriate UVB response) while the cell indicated in bottom panels is only positive for Ki67 (staining green, appropriate UVB response). The location of the basement membrane is indicated by a grey dashed line. Similar sections were stained with H&E to determine the total number of basal layer keratinocytes in each biopsy.
